# Supplementary material for: Organic–inorganic hybrid Co-containing polyoxoniobates as hydrogen evolution catalysts in alkaline media
Source: Royal Society of Chemistry journal article supplement (doi:10.1039/d4dt03071k), 2025-01-01
Supplement: d4dt03071k1.pdf [file d4dt03071k1.pdf]

## ***Supporting Information***

### **Organic-Inorganic Hybrid Co-Containing Polyoxoniobates as Hydrogen Evolution Catalyst in Alkaline Media**

Chun-Xia Chen, Shui-Lin Duan, Xiao-Yue Zhang, Rong-Zhi Sun, Ping-Wei Cai, Cai Sun\* and Shou-Tian Zheng\*

*Fujian Provincial Key Laboratory of Advanced Inorganic Oxygenated Materials, College of Chemistry, Fuzhou University, Fuzhou, Fujian 350108, China.*

E-mail: [csun@fzu.edu.cn](mailto:csun@fzu.edu.cn); [stzheng@fzu.edu.cn](mailto:stzheng@fzu.edu.cn)

#### **CONTENTS**

|                                      |         |
|--------------------------------------|---------|
| <b>1. Experimental section</b> ..... | S1-S3   |
| <b>2. Additional tables</b> .....    | S4-S9   |
| <b>3. Additional figures</b> .....   | S10-S16 |
| <b>4. References</b> .....           | S16-S17 |

# 1. Experimental section

## Materials and measurements:

All chemicals used for syntheses were purchased from commercial sources, and no further purifications were conducted before their usages, except for the  $K_7H[Nb_6O_{19}] \cdot 13H_2O$  was synthesized based on the literature method.<sup>1</sup> The powder X-ray diffraction (PXRD) patterns were tested using a RIGAKU-Miniflex II diffractometer with Cu  $K_\alpha$  radiation ( $\lambda = 1.54056 \text{ \AA}$ ) ranging from  $5^\circ$  to  $50^\circ$ . Fourier transform infrared spectroscopy (FT-IR) was detected by the Opus Vertex 70 FT-IR infrared spectrophotometer in the range of  $4000\text{-}500 \text{ cm}^{-1}$ . Thermogravimetric analysis (TGA) was performed using a NETZSCH STA 449C thermal analyzer with a heating rate of  $10 \text{ }^\circ\text{C}/\text{min}$  from  $30 \text{ }^\circ\text{C}$  to  $800 \text{ }^\circ\text{C}$  in a dynamic argon atmosphere. The Ultraviolet-visible (UV-vis) spectra was measured on a SHIMADZU UV-2600 UV-visible spectrophotometer ranging from 200 to 800 nm by using the  $BaSO_4$  as the blank. X-ray photoelectron spectroscopy (XPS) was performed in a ThermoFisher ESCALAB250 X-ray photoelectron spectrometer (powered at 150 W) using Al  $K_\alpha$  radiation ( $\lambda = 8.357 \text{ \AA}$ ). Scanning electron microscopy (SEM) and transmission electron microscopy (TEM) was detected by Zeiss Sigma 300 Thermal Field Emission Scanning Electron Microscope. High-resolution TEM (HRTEM) together with its element mapping was carried out on the TEM (FEI Talos F200S G2) to further understand the microstructure details.

### Synthesis of $[Co(en)_3]_3[Ti_2Nb_8O_{28}](OH) \cdot 11H_2O$ ( $Co_3\text{-}Ti_2Nb_8$ ):

A mixture of  $K_7H[Nb_6O_{19}] \cdot 13H_2O$  (0.66 g, 0.486 mmol),  $Co(Ac)_2 \cdot 4H_2O$  (0.150 g, 0.612 mmol),  $K_2TiF_6$  (0.156 g, 0.650 mmol),  $Li_2B_4O_7$  (0.063 g, 0.371 mmol) and  $NaHCO_3$  (0.176 g, 2.091 mmol) was added into 8 mL distilled water. In addition, 0.10 mL en (en = ethylenediamine) were added into the solution, stirred for 1 hour, and then transferred to a glass bottle (20 mL). It was kept at  $100 \text{ }^\circ\text{C}$  for 3 days, and cooled to room temperature. The long yellow strip crystals  $Co_3\text{-}Ti_2Nb_8$  were obtained by further washing with distilled water and drying completely. Yield: 100 mg (10.5 %, based on  $K_7H[Nb_6O_{19}] \cdot 13H_2O$ ).

### Synthesis of $[K(H_2O)_2]_2[Co(en)_3]_2[Ti_2Nb_8O_{28}] \cdot 8H_2O$ ( $Co_2\text{-}Ti_2Nb_8$ ):

A mixture of  $K_7H[Nb_6O_{19}] \cdot 13H_2O$  (0.678 g, 0.495 mmol),  $Co(Ac)_2 \cdot 4H_2O$  (0.151 g, 0.607 mmol),  $K_2Ti(C_2O_4) \cdot 4H_2O$  (0.210 g, 0.594 mmol),  $Li_2B_4O_7$  (0.075 g, 0.445 mmol) and  $NaHCO_3$  (0.170 g, 2.022 mmol) was added into 8 mL distilled water. In addition, 0.10 mL en (en = ethylenediamine) were added into the solution, stirred for 1 hour, and then transferred to a glass bottle (20 mL). It was kept at  $100 \text{ }^\circ\text{C}$  for 3 days, and cooled to room temperature. The yellow square crystals  $Co_2\text{-}Ti_2Nb_8$  were obtained by further washing with distilled water and drying completely. Yield: 120 mg (13.2 %, based on  $K_7H[Nb_6O_{19}] \cdot 13H_2O$ ).

### Synthesis of $[Cu(en)_2][Cu(en)_2(H_2O)_2]_3[Ti_2Nb_8O_{28}] \cdot 8H_2O$ ( $Cu_4\text{-}Ti_2Nb_8$ ):

The compound  $Cu_4\text{-}Ti_2Nb_8$  was synthesized based on the literature method.<sup>2</sup>  $K_7H[Nb_6O_{19}] \cdot 13H_2O$  (0.10 g),  $Cu(NO_3)_2 \cdot 3H_2O$  (0.10 g), titanium isopropoxide (0.3 ml) were mixed in water (8 ml). Then five drops of en were added to adjust the pH value of mixture to 11.5-12.2. The mixture was transferred into a 23ml capacity PTFE-lined autoclave and heated at  $140 \text{ }^\circ\text{C}$  for 3 days. After slow cooling to room temperature, purple block-like crystals for X-ray crystallography were obtained, washed with distilled water and then air-dried. Yield: 115 mg (56 %, based on  $K_7H[Nb_6O_{19}] \cdot 13H_2O$ ).

### Single-crystal X-ray diffraction:

Single-crystal X-ray diffraction data of  $Co_3\text{-}Ti_2Nb_8$  and  $Co_2\text{-}Ti_2Nb_8$  were collected on the Bruker APEX-II CCD area diffractometer, using  $MoK_\alpha$  radiation with  $\lambda = 0.71073 \text{ \AA}$ , under nitrogen atmosphere, and at 170 K. The empirical absorption correction was based on equivalent reflections. The crystal structures were solved by the direct method and refined by the full-matrix least-squares method on  $F^2$ , according to the SHELX and Olex2.<sup>3,4</sup> All non-hydrogen atoms were refined anisotropically. The contribution of disordered solvent molecules to the overall intensity data of structures was treated using the SQUEEZE method in PLATON.<sup>5</sup> Crystallographic data for the

structures reported have been deposited in the Cambridge Crystallographic Data Centre. The entries of CCDC-2389171 and CCDC-2389169 contain the supplementary crystallographic data for  $\text{Co}_3\text{-Ti}_2\text{Nb}_8$  and  $\text{Co}_2\text{-Ti}_2\text{Nb}_8$ . These data can be obtained free of charge at <http://www.ccdc.cam.ac.uk/conts/retrieving.html>. The selected crystal parameters, data collection, and refinements are summarized in Table S1.

#### **Disorder treatment details for $[\text{Co}(\text{en})_3]_3[\text{Ti}_2\text{Nb}_8\text{O}_{28}](\text{OH})\cdot 11\text{H}_2\text{O}$ :**

The en ligands coordinated to Co1 and Co3 were disordered over two sites (C1~C6, N1~N6 vs. C1A~C6A, N1A~N6A and C7~C12, N7~N12 vs. C7A~C12A, N7A~N12A) with occupancies of 0.533:0.467 and 0.803:0.197, respectively. Two  $\text{Co}(\text{en})_3$  species (Co2 and Co4) across symmetry element were modelled as special disorder with occupancy of 0.5. The geometry and atomic displacement parameters were restrained by SHELXL SAME, DFIX, ISOR and SIMU instructions respectively to make sure the disorder components chemically reasonable and refinement stable.

#### **The preparation of the working electrode :**

For the preparation of the working electrode, 5 mg of catalyst was dispersed in a mixed solution containing 30  $\mu\text{L}$  of Nafion solution (10%, DuPont, Wilmington, Delaware, USA), and 300  $\mu\text{L}$  of water/isopropanol ( $v/v = 1:1$ ). Then, the suspension was ultrasonicated for 30 minutes to form a homogeneous ink. The carbon cloth (CC) was first degreased by sonication in acetone and carefully washed with 0.5 M HCl in an ultrasonic bath for 20 min to remove the surface oxidation layer. Finally, apply 66  $\mu\text{L}$  of catalyst ink in a uniform drop onto a CC with an area of  $0.5 \times 0.4 \text{ cm}^2$  and controlled catalyst loading of  $5 \text{ mg cm}^{-2}$ .

#### **Electrochemical HER measurements:**

Electrochemical measurements were performed in the standard three-electrode system of the Zennium-pro (Germany Zahner Instrument) electrochemical workstation. All the electrochemical tests were carried out at room temperature. Graphite rod and Hg/HgO (saturated 1 M KOH solution) electrodes were employed as the counter electrode (CE) and reference electrode (RE), respectively. In this work, the catalysis of HER was performed in 1 M KOH (pH = 13.85, 25 °C). All the potentials mentioned for this work were calibrated against the reversible hydrogen electrode (RHE) according to the equation:  $E_{\text{RHE}} = E_{\text{Hg/HgO}} + 0.098 + 0.0591 \times \text{pH}$ . In particular, the cyclic voltammetry (CV) tests were first performed at a scan rate of  $100 \text{ mV s}^{-1}$  for 10 cycles to attain a stable state. Then, linear sweep voltammetry (LSV) curves of HER were recorded at a scan rate of  $10 \text{ mV s}^{-1}$  over a potential range of -0.9 to -2 V. The Tafel plots were graphed using the Tafel equation,  $\eta = b (\log |j|) + a$ , in which  $b$  is the Tafel slope, and  $j$  is the current density. For evaluating the electrochemically active surface area (ECSA), CV was performed between -0.8 and -0.9 V at scan rates from 20 to  $100 \text{ mV s}^{-1}$ . The  $C_{\text{dl}}$  values were estimated by plotting  $\Delta j = (j_a - j_c) \times 0.5$  at -0.85 V against the scan rates, where  $j_a$  and  $j_c$  are the anode and cathode current densities, respectively. ECSA was obtained according to the following formula,  $\text{ECSA} = C_{\text{dl}} / C^*$ , where  $C_{\text{dl}}$  represents the double-layer capacitance and  $C^*$  ( $40 \mu\text{F cm}^{-2}$ ) is the specific capacitance, it is feasible to calculate the active surface area of the electrode. The turnover frequency (TOF) values were calculated from the activity of the catalysts per active site following the equation:  $\text{TOF} = j \times A_{\text{geo}} / (n \times F \times m_{\text{site}})$ , where  $j$  is the current density at a potential,  $A_{\text{geo}}$  is the electrode area,  $n$  is the number of electrons (2 for HER),  $F$  is the Faraday constant ( $96485 \text{ C/mol}$ ), and  $m_{\text{site}}$  is the total number of metal sites.<sup>27</sup> The EIS measurements were performed with an open-circuit potential using an AC voltage of 5 mV amplitude and a frequency range of 0.01 kHz to 100 kHz. In the end, the electrode stability was tested by the chronopotentiometry method at  $10 \text{ mA cm}^{-2}$ . All experiments were performed at room temperature.

## 2. Additional tables

| Complex                                     | Co <sub>3</sub> -Ti <sub>2</sub> Nb <sub>8</sub>                                                                | Co <sub>2</sub> -Ti <sub>2</sub> Nb <sub>8</sub>                                                                               |
|---------------------------------------------|-----------------------------------------------------------------------------------------------------------------|--------------------------------------------------------------------------------------------------------------------------------|
| Empirical formula                           | C <sub>18</sub> H <sub>95</sub> Co <sub>3</sub> N <sub>18</sub> Nb <sub>8</sub> O <sub>40</sub> Ti <sub>2</sub> | C <sub>12</sub> H <sub>72</sub> Co <sub>2</sub> K <sub>2</sub> N <sub>12</sub> Nb <sub>8</sub> O <sub>40</sub> Ti <sub>2</sub> |
| Formula weight                              | 2219.98                                                                                                         | 2059.810                                                                                                                       |
| Crystal size (mm <sup>3</sup> )             | 0.3 × 0.1 × 0.1                                                                                                 | 0.2 × 0.2 × 0.1                                                                                                                |
| Crystal system                              | monoclinic                                                                                                      | monoclinic                                                                                                                     |
| Space group                                 | <i>P</i> 2 <sub>1</sub> / <i>c</i>                                                                              | <i>P</i> 2 <sub>1</sub> / <i>n</i>                                                                                             |
| <i>a</i> (Å)                                | 12.1776(4)                                                                                                      | 9.882(3)                                                                                                                       |
| <i>b</i> (Å)                                | 38.7820(14)                                                                                                     | 21.468(5)                                                                                                                      |
| <i>c</i> (Å)                                | 14.7815(6)                                                                                                      | 12.867(3)                                                                                                                      |
| $\alpha$ (°)                                | 90                                                                                                              | 90                                                                                                                             |
| $\beta$ (°)                                 | 100.796(4)                                                                                                      | 92.361(3)                                                                                                                      |
| $\gamma$ (°)                                | 90                                                                                                              | 90                                                                                                                             |
| <i>V</i> (Å <sup>3</sup> )                  | 6857.3(4)                                                                                                       | 2727.3(12)                                                                                                                     |
| <i>Z</i>                                    | 4                                                                                                               | 2                                                                                                                              |
| <i>F</i> (000)                              | 4396.0                                                                                                          | 1851.4                                                                                                                         |
| $\rho_{\text{calcd}}$ (g cm <sup>-3</sup> ) | 2.150                                                                                                           | 2.508                                                                                                                          |
| Temperature (K)                             | 170.0                                                                                                           | 170.0                                                                                                                          |
| $\mu$ (mm <sup>-1</sup> )                   | 2.305                                                                                                           | 2.743                                                                                                                          |
| Refl. Collected                             | 62174                                                                                                           | 11168                                                                                                                          |
| Independent refl.                           | 15898                                                                                                           | 4735                                                                                                                           |
| Parameters                                  | 1144                                                                                                            | 373                                                                                                                            |
| GOF on <i>F</i> <sup>2</sup>                | 1.089                                                                                                           | 1.065                                                                                                                          |
| <i>R</i> <sub>1</sub> [ <i>I</i> > 2σ]      | <i>R</i> <sub>1</sub> <sup>a</sup> = 0.0830, <i>wR</i> <sub>2</sub> <sup>b</sup> = 0.1942                       | <i>R</i> <sub>1</sub> <sup>a</sup> = 0.0173, <i>wR</i> <sub>2</sub> <sup>b</sup> = 0.0414                                      |
| <i>R</i> <sub>1</sub> (all data)            | <i>R</i> <sub>1</sub> <sup>a</sup> = 0.1069, <i>wR</i> <sub>2</sub> <sup>b</sup> = 0.2049                       | <i>R</i> <sub>1</sub> <sup>a</sup> = 0.0192, <i>wR</i> <sub>2</sub> <sup>b</sup> = 0.0422                                      |

Table S1. Crystallographic data for Co<sub>3</sub>-Ti<sub>2</sub>Nb<sub>8</sub> and Co<sub>2</sub>-Ti<sub>2</sub>Nb<sub>8</sub>.

$$^{\text{[a]}}R_1 = \sum ||F_o| - |F_c|| / \sum |F_o|, \quad ^{\text{[b]}}wR_2 = \{ \sum w(F_o^2 - F_c^2)^2 / \sum w(F_o^2)^2 \}^{1/2}$$

**Table S2. Bond values and calculations for each atom in Co<sub>3</sub>-Ti<sub>2</sub>Nb<sub>8</sub>.**

| Atoms code | Bond Valence | Valence state |
|------------|--------------|---------------|
| Nb1        | 4.88842      | 5             |
| Nb2        | 4.86555      | 5             |
| Nb3        | 4.84642      | 5             |
| Nb4        | 4.95897      | 5             |
| Nb5        | 4.91144      | 5             |
| Nb6        | 4.86244      | 5             |
| Nb7        | 4.86906      | 5             |
| Nb8        | 4.94513      | 5             |
| Ti1        | 3.93243      | 4             |
| Ti2        | 3.96302      | 4             |
| Co1        | 2.70201      | 3             |
| Co2        | 2.81466      | 3             |
| Co3        | 2.70120      | 3             |
| Co4        | 2.68326      | 3             |

**Table S3. Bond values and calculations for each atom in Co<sub>2</sub>-Ti<sub>2</sub>Nb<sub>8</sub>.**

| Atoms code | Bond Valence | Valence state |
|------------|--------------|---------------|
| Nb1        | 4.86198      | 5             |
| Nb2        | 4.84258      | 5             |
| Nb3        | 4.88145      | 5             |
| Nb4        | 4.84278      | 5             |
| Ti1        | 3.97044      | 4             |
| Co1        | 2.49696      | 3             |

**Table S4 Selected bond lengths (Å) for Co<sub>3</sub>-Ti<sub>2</sub>Nb<sub>8</sub>**

| <b>Bond</b> | <b>Dist</b> | <b>Bond</b>          | <b>Dist</b> |
|-------------|-------------|----------------------|-------------|
| Nb1-O5      | 1.982(8)    | Co2-N2               | 1.93(2)     |
| Nb1-O13     | 2.026(7)    | Co2-N2 <sup>1</sup>  | 1.93(2)     |
| Nb1-O16     | 2.455(6)    | Co3-N7               | 1.946(15)   |
| Nb1-O21     | 1.768(8)    | Co3-N8               | 1.967(17)   |
| Nb1-O22     | 1.973(7)    | Co3-N9               | 1.904(16)   |
| Nb1-O27     | 2.002(8)    | Co3-N10              | 1.990(17)   |
| Nb2-O2      | 2.122(7)    | Co3-N11              | 1.994(17)   |
| Nb2-O5      | 1.938(7)    | Co3-N12              | 2.000(18)   |
| Nb2-O6      | 2.071(7)    | Co4-N80              | 1.85(2)     |
| Nb2-O7      | 1.922(7)    | Co4-N80 <sup>2</sup> | 1.87(2)     |
| Nb2-O14     | 1.767(8)    | Co4-N34              | 1.94(2)     |
| Nb2-O16     | 2.385(6)    | Co4-N34 <sup>2</sup> | 1.94(2)     |
| Nb3-O1      | 1.764(8)    | Co4-N79              | 1.95(2)     |
| Nb3-O2      | 2.086(7)    | Co4-N79 <sup>2</sup> | 1.95(2)     |
| Nb3-O6      | 2.080(7)    | Ti1-O2               | 2.006(7)    |
| Nb3-O24     | 1.954(8)    | Ti1-O8               | 1.813(7)    |
| Nb3-O26     | 2.400(7)    | Ti1-O13              | 1.825(7)    |
| Nb3-O28     | 1.932(8)    | Ti1-O16              | 2.184(7)    |
| Nb4-O8      | 2.019(8)    | Ti1-O18              | 2.020(7)    |
| Nb4-O12     | 1.752(8)    | Ti1-O26              | 2.143(7)    |
| Nb4-O19     | 1.970(9)    | Ti2-O3               | 1.820(7)    |
| Nb4-O20     | 1.996(8)    | Ti2-O6               | 1.982(7)    |
| Nb4-O24     | 1.987(9)    | Ti2-O9               | 2.022(7)    |
| Nb4-O26     | 2.482(7)    | Ti2-O11              | 1.824(7)    |
| Nb5-O3      | 2.035(7)    | Ti2-O16              | 2.163(7)    |
| Nb5-O17     | 2.000(8)    | Ti2-O26              | 2.155(7)    |
| Nb5-O19     | 1.975(9)    | N1-C11               | 1.12(5)     |
| Nb5-O25     | 1.745(9)    | N80-C16              | 1.37(4)     |
| Nb5-O26     | 2.477(7)    | N80-C14              | 1.398(10)   |
| Nb5-O28     | 2.002(8)    | N3-C9                | 1.51(3)     |
| Nb6-O4      | 1.755(9)    | N4-C13               | 1.59(4)     |
| Nb6-O9      | 2.097(7)    | N5-C12               | 1.67(4)     |

| <b>Bond</b>          | <b>Dist</b> | <b>Bond</b>          | <b>Dist</b> |
|----------------------|-------------|----------------------|-------------|
| Nb6-O17              | 1.939(8)    | N6-C1                | 1.70(6)     |
| Nb6-O18              | 2.093(7)    | N7-C3                | 1.50(2)     |
| Nb6-O20              | 1.935(8)    | N8-C5                | 1.55(3)     |
| Nb6-O26              | 2.412(7)    | N9-C4                | 1.63(2)     |
| Nb7-O9               | 2.098(7)    | N10-C10              | 1.46(3)     |
| Nb7-O15              | 1.918(8)    | N11-C7               | 1.61(3)     |
| Nb7-O16              | 2.421(6)    | N12-C8               | 1.50(3)     |
| Nb7-O18              | 2.116(7)    | N34-C18              | 1.49(4)     |
| Nb7-O23              | 1.761(9)    | N34-C23              | 1.47(5)     |
| Nb7-O27              | 1.926(8)    | N79-C17              | 1.25(3)     |
| Nb8-O7               | 2.010(7)    | N79-C21              | 1.24(4)     |
| Nb8-O10              | 1.745(8)    | N15-C6               | 1.57(3)     |
| Nb8-O11              | 2.019(7)    | N14-C2               | 1.43(3)     |
| Nb8-O15              | 1.987(7)    | N2-C19               | 1.38(4)     |
| Nb8-O16              | 2.452(6)    | C2-C19               | 1.62(4)     |
| Nb8-O22              | 1.984(8)    | C3-C7                | 1.52(3)     |
| Co1-N1               | 2.00(2)     | C4-C5                | 1.53(3)     |
| Co1-N3               | 1.948(13)   | C6-C9                | 1.63(4)     |
| Co1-N4               | 1.935(14)   | C8-C10               | 1.56(3)     |
| Co1-N5               | 1.949(16)   | C11-C1               | 1.57(6)     |
| Co1-N6               | 1.965(16)   | C12-C13              | 1.56(5)     |
| Co1-N15              | 1.965(12)   | C16-C17 <sup>2</sup> | 1.75(4)     |
| Co2-O33 <sup>1</sup> | 1.99(2)     | C17-C21              | 1.91(5)     |
| Co2-O33              | 1.99(2)     | C18-C14 <sup>2</sup> | 1.82(5)     |
| Co2-N14              | 1.96(2)     | C21-C23 <sup>2</sup> | 1.66(7)     |
| Co2-N14 <sup>1</sup> | 1.96(2)     |                      |             |

**Table S5 Selected bond lengths (Å) for Co<sub>2</sub>-Ti<sub>2</sub>Nb<sub>8</sub>**

| <b>Bond</b> | <b>Dist</b> | <b>Bond</b> | <b>Dist</b> |
|-------------|-------------|-------------|-------------|
| Nb1-O1      | 1.773(3)    | Co1-N4      | 1.974(4)    |
| Nb1-O3      | 2.006(3)    | Co1-N5      | 1.975(4)    |
| Nb1-O7      | 2.471(3)    | Co1-N6      | 1.974(4)    |
| Nb1-O9      | 1.967(3)    | Ti1-O2      | 2.019(3)    |

| <b>Bond</b>         | <b>Dist</b> | <b>Bond</b>          | <b>Dist</b> |
|---------------------|-------------|----------------------|-------------|
| Nb1-O10             | 2.039(3)    | Ti1-O4               | 1.990(3)    |
| Nb1-O11             | 1.971(3)    | Ti1-O6               | 1.833(3)    |
| Nb2-O21             | 2.096(3)    | Ti1-O7               | 2.130(3)    |
| Nb2-O3              | 1.925(3)    | Ti1-O7 <sup>1</sup>  | 2.141(3)    |
| Nb2-O4              | 2.088(3)    | Ti1-O10 <sup>1</sup> | 1.823(3)    |
| Nb2-O7              | 2.392(3)    | K1-O4                | 3.209(3)    |
| Nb2-O8              | 1.930(3)    | K1-O6                | 2.976(3)    |
| Nb2-O13             | 1.778(3)    | K1-O8                | 2.895(3)    |
| Nb3-O5              | 1.967(3)    | K1-O11 <sup>4</sup>  | 2.951(3)    |
| Nb3-O6              | 2.038(3)    | K1-O14 <sup>4</sup>  | 3.110(3)    |
| Nb3-O7              | 2.479(3)    | K1-O16 <sup>4</sup>  | 2.820(4)    |
| Nb3-O8              | 2.011(3)    | K1-O20 <sup>3</sup>  | 2.755(4)    |
| Nb3-O9              | 1.969(3)    | K1-O20               | 2.723(4)    |
| Nb3-O12             | 1.766(3)    | N1-C5                | 1.504(6)    |
| Nb4-O2              | 2.114(3)    | N2-C2                | 1.488(6)    |
| Nb4-O4 <sup>1</sup> | 2.105(3)    | N3-C4                | 1.493(6)    |
| Nb4-O5              | 1.929(3)    | N4-C3                | 1.499(6)    |
| Nb4-O7              | 2.440(3)    | N5-C6                | 1.511(6)    |
| Nb4-O11             | 1.932(3)    | N6-C1                | 1.491(6)    |
| Nb4-O14             | 1.752(3)    | C1-C4                | 1.525(7)    |
| Co1-N1              | 1.969(4)    | C2-C3                | 1.516(6)    |
| Co1-N2              | 1.962(4)    | C5-C6                | 1.520(7)    |
| Co1-N3              | 1.970(4)    |                      |             |



**Table S6. The comparison of HER catalytic activity of the present study with the reported systems.**

| Catalysts                                                                | Electrolyte      | overpotential ( $\eta$ )@ mA/cm <sup>2</sup> | Ref.             |
|--------------------------------------------------------------------------|------------------|----------------------------------------------|------------------|
| CoP-2ph-CMP-800                                                          | 1.0 M KOH        | 360 mV@10                                    | 6                |
| Co/NGC-3                                                                 | 0.1 M KOH        | 293 mV@10                                    | 7                |
| Co <sub>9</sub> S <sub>8</sub> /NiS@C/GC                                 | 1.0 M KOH        | 280mV@10                                     | 8                |
| Co-P-300                                                                 | 1.0 M KOH        | 280 mV@10                                    | 9                |
| CuCo@NC                                                                  | 0.1 M KOH        | 277 mV@10                                    | 10               |
| Co/CoP-NC                                                                | 1.0 M KOH        | 260 mV@10                                    | 11               |
| V <sub>3</sub> Nb <sub>12</sub>                                          | 0.1 M KOH        | 258.1 mV@10                                  | 12               |
| Co/CoP-5                                                                 | 1.0 M KOH        | 253 mV@10                                    | 13               |
| Co-PCNFs                                                                 | 1.0 M KOH        | 249 mV@10                                    | 14               |
| CTS <sub>0.2</sub> -rGO/NF                                               | 1.0 M KOH        | 233.1 mV@20                                  | 15               |
| Co@NG                                                                    | 1.0 M KOH        | 220 mV@10                                    | 16               |
| Cu <sub>0.3</sub> Co <sub>2.7</sub> P/NC                                 | 1.0 M KOH        | 220 mV@10                                    | 17               |
| CoP/CC                                                                   | 1.0 M KOH        | 209 mV@10                                    | 18               |
| CoS <sub>2</sub> NTA/CC                                                  | 1.0 M KOH        | 193 mV@10                                    | 19               |
| (Fe <sub>0.75</sub> Co <sub>0.25</sub> ) <sub>5</sub> C <sub>2</sub>     | 0.1 M KOH        | 174 mV@10                                    | 20               |
| <b>[Ti<sub>2</sub>Nb<sub>8</sub>O<sub>28</sub>]-{Co(en)}<sub>3</sub></b> | <b>1.0 M KOH</b> | <b>172mV@10</b>                              | <b>This work</b> |
| CoS <sub>2</sub> -MoS <sub>2</sub> /CC                                   | 1.0 M KOH        | 147 mV@10                                    | 21               |
| Co-Mo-S/CC                                                               | 1.0 M KOH        | 118 mV@10                                    | 22               |

### 3. Additional figures

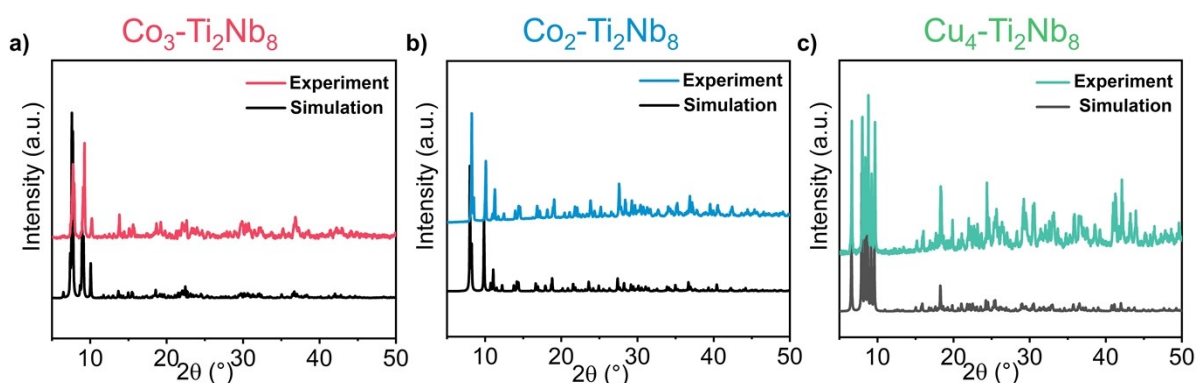

Fig. S1. Simulated and experimental PXRD patterns of a)  $\text{Co}_3\text{-Ti}_2\text{Nb}_8$ , b)  $\text{Co}_2\text{-Ti}_2\text{Nb}_8$  and c)  $\text{Cu}_4\text{-Ti}_2\text{Nb}_8$ .

The powder X-ray diffraction test was carried out for the three compounds of  $\text{Co}_3\text{-Ti}_2\text{Nb}_8$ ,  $\text{Co}_2\text{-Ti}_2\text{Nb}_8$  and  $\text{Cu}_4\text{-Ti}_2\text{Nb}_8$  at room temperature (Fig. S1a, 1b, 1c). The peak positions are consistent with the simulated diffraction peak, indicating that the powder samples of the compound powder samples are pure phase.

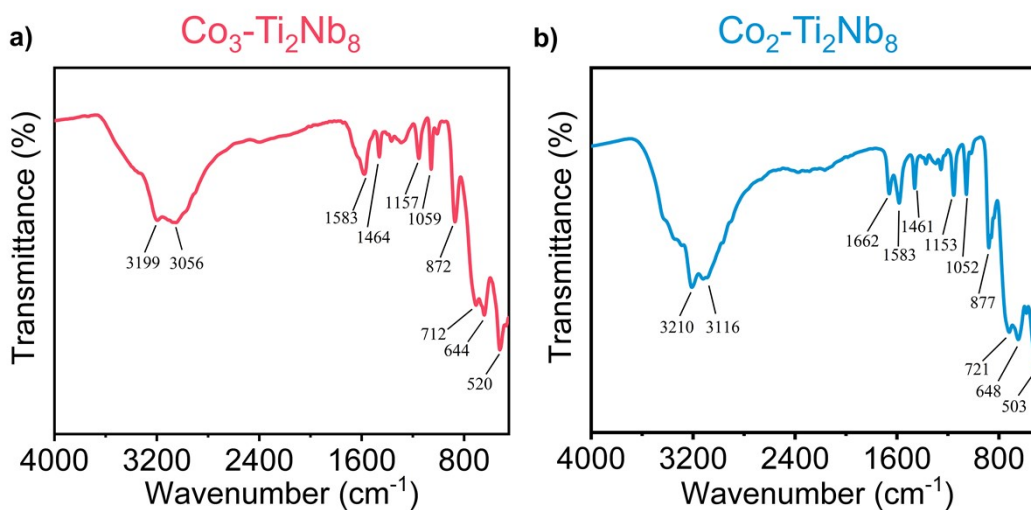

Fig. S2. IR spectrum of a)  $\text{Co}_3\text{-Ti}_2\text{Nb}_8$  and b)  $\text{Co}_2\text{-Ti}_2\text{Nb}_8$ .

Fourier transform infrared (FTIR) of  $\text{Co}_3\text{-Ti}_2\text{Nb}_8$  and  $\text{Co}_2\text{-Ti}_2\text{Nb}_8$  were tested. As shown in Fig. S2a, 2b, The IR spectrum of  $\text{Co}_3\text{-Ti}_2\text{Nb}_8$  is shown in Fig. S2a. The broad absorption peaks around  $3200\text{ cm}^{-1}$  are attributed to the  $\nu(\text{O-H})$  stretching vibration of water. Peaks at  $3056\text{ cm}^{-1}$  and  $3199\text{ cm}^{-1}$  are attributed to the  $\nu(\text{C-H})$  and  $\nu(\text{N-H})$  stretching vibrations, while the peaks at  $1583\text{ cm}^{-1}$ ,  $1464\text{ cm}^{-1}$  ascribe to the  $\delta(\text{N-H})$  and  $\delta(\text{C-H})$  bending vibrations. Peaks at positions  $1157\text{ cm}^{-1}$  and  $1059\text{ cm}^{-1}$  mainly ascribe to the  $\nu(\text{C-N})$ . The absorption at  $872\text{ cm}^{-1}$  is attributed to the  $\nu(\text{Nb=O}_i)$  vibrations of  $\text{Co}_3\text{-Ti}_2\text{Nb}_8$ , while the peaks at  $712\text{ cm}^{-1}$ ,  $644\text{ cm}^{-1}$  and  $520\text{ cm}^{-1}$  belong to the  $\nu(\text{Nb-O}_b\text{-Nb})$  vibrations.

The IR spectrum of  $\text{Co}_2\text{-Ti}_2\text{Nb}_8$  is similar to  $\text{Co}_3\text{-Ti}_2\text{Nb}_8$  as shown in Fig. S2b. Peaks at  $3210\text{ cm}^{-1}$  ascribe to the  $\nu(\text{O-H})$  and  $\nu(\text{N-H})$ . Peaks at  $3116\text{ cm}^{-1}$  are attributed to the  $\nu(\text{C-H})$  stretching vibrations, while the peaks at  $1583\text{ cm}^{-1}$ ,  $1461\text{ cm}^{-1}$  ascribe to the  $\delta(\text{N-H})$  and  $\delta(\text{C-H})$  bending vibrations. Peaks at

positions  $1153\text{ cm}^{-1}$  and  $1052\text{ cm}^{-1}$  mainly ascribe to the  $\nu(\text{C-N})$ . The absorption at  $877\text{ cm}^{-1}$  is attributed to the  $\nu(\text{Nb=O}_i)$  vibrations, while the peaks at  $721\text{ cm}^{-1}$ ,  $648\text{ cm}^{-1}$  and  $503\text{ cm}^{-1}$  belong to the  $\nu(\text{Nb-O}_b\text{-Nb})$  vibrations.

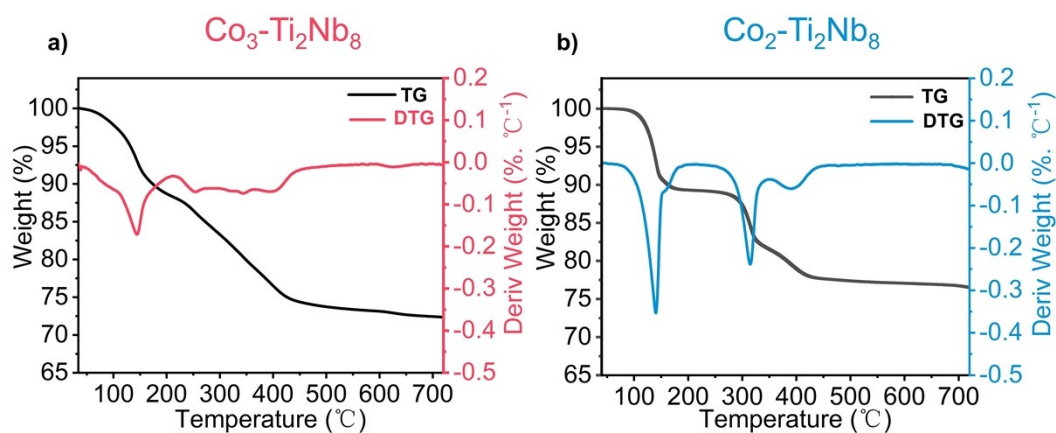

Fig. S3. TG and DTG curves of a)  $\text{Co}_3\text{-Ti}_2\text{Nb}_8$  and b)  $\text{Co}_2\text{-Ti}_2\text{Nb}_8$ .

As shown in Fig. S3, the thermogravimetric analysis of the  $\text{Co}_3\text{-Ti}_2\text{Nb}_8$  is shown in Fig. S3a. The first weight-loss stage within the range of  $25\text{ }^\circ\text{C}$  to  $169.83\text{ }^\circ\text{C}$  mainly ascribed to the loss of water molecules. Based on the first weight-loss of about  $8.21\%$  for  $\text{Co}_3\text{-Ti}_2\text{Nb}_8$ , there are about 11 water molecules. The thermogravimetric analysis of the  $\text{Co}_2\text{-Ti}_2\text{Nb}_8$  is shown in Fig. S3b, the first weight-loss stage within the range of  $25\text{ }^\circ\text{C}$  to  $170.67\text{ }^\circ\text{C}$  mainly ascribed to the loss of water molecules. Based on the first weight-loss of about  $10.35\%$  for  $\text{Co}_2\text{-Ti}_2\text{Nb}_8$ , corresponding to the loss of 8 free water molecules, 4 ligand water molecules.

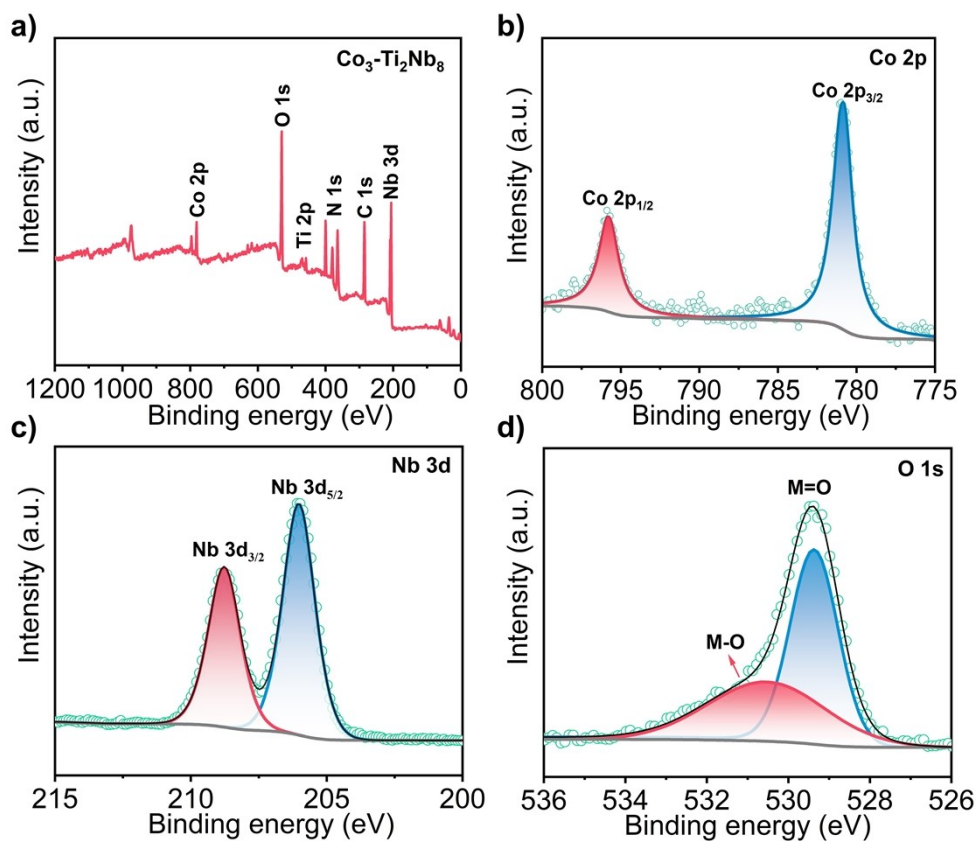

Fig. S4. XPS spectra of  $\text{Co}_3\text{-Ti}_2\text{Nb}_8$ . a) survey spectrum; b) XPS spectrum of Co 2p; c) XPS spectrum of Nb

3d; d) XPS spectrum of O 1s.

The XPS measured spectra of  $\text{Co}_3\text{-Ti}_2\text{Nb}_8$  are shown in Fig. S4. The presence of the elements Nb, Ti, Co, O, N, and C is evident as shown in Fig. S4a. The Co 2p spectrum consists of two spin-orbit bimodal peaks, and the observation that the Co  $2p_{3/2}$  and Co  $2p_{1/2}$  binding energies of 780.88 and 795.88 eV, respectively (Fig. S4b). These results indicate that cobalt ions exist in their highest oxidation state, i.e.,  $\text{Co}^{3+}$ .<sup>23, 24</sup> The Nb  $3d_{5/2}$  and Nb  $3d_{3/2}$  peaks are attributed to the Nb 3d spectra of  $\text{Co}_3\text{-Ti}_2\text{Nb}_8$ , located at 206.08 and 208.78 eV, respectively (Fig. S4c). In addition, as shown in Fig. S4d, the fitted O 1s high-resolution spectra and fitted peaks correspond to the Nb-O bond (529.38 eV) and Co-O bond, (530.68 eV) respectively.<sup>25, 26</sup>

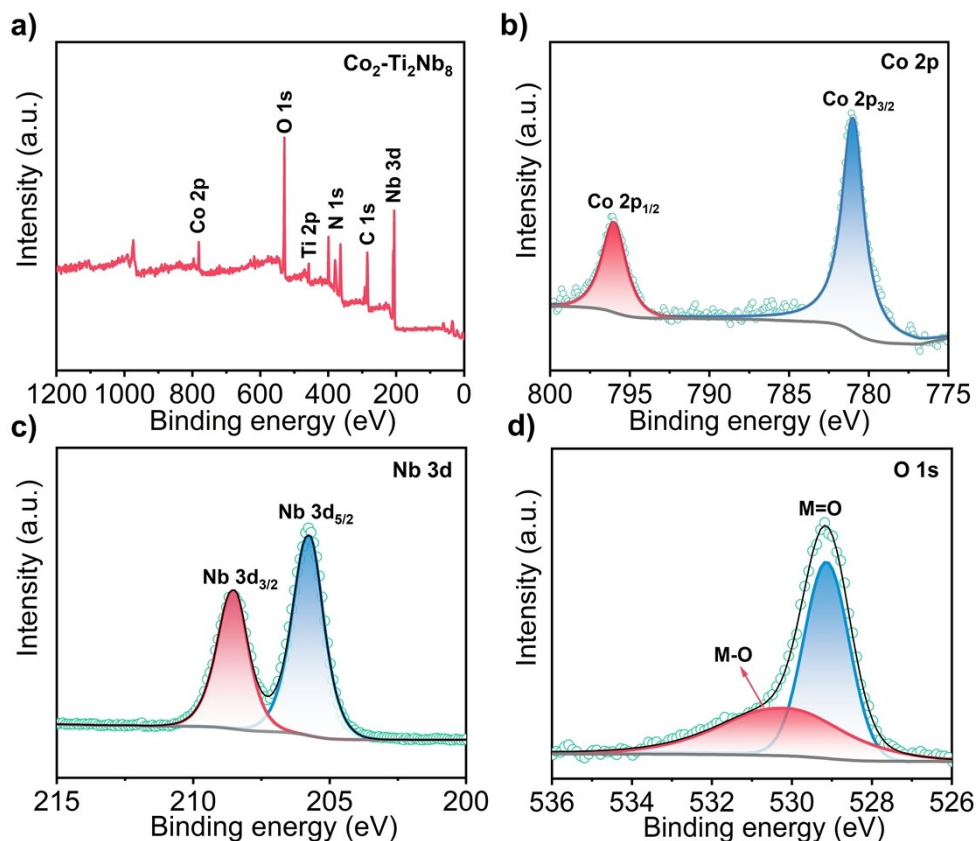

**Fig. S5.** XPS spectra of  $\text{Co}_2\text{-Ti}_2\text{Nb}_8$ . a) survey spectrum; b) XPS spectrum of Co 2p; c) XPS spectrum of Nb 3d; d) XPS spectrum of O 1s.

The XPS measured spectra of  $\text{Co}_2\text{-Ti}_2\text{Nb}_8$  are shown in Fig. S5. The presence of the elements Nb, Ti, Co, O, N, and C is evident as shown in Fig. S5a. The Co 2p spectrum consists of two spin-orbit bimodal peaks and two accompanying peaks, and the observation that the Co  $2p_{3/2}$  and Co  $2p_{1/2}$  binding energies of 780.88 and 795.78 eV, respectively (Fig. S5b). These results indicate that cobalt ions exist in their highest oxidation state, i.e.,  $\text{Co}^{3+}$ .<sup>24, 25</sup> The Nb  $3d_{5/2}$  and Nb  $3d_{3/2}$  peaks are attributed to the Nb 3d spectra of  $\text{Co}_2\text{-Ti}_2\text{Nb}_8$ , located at 205.78 and 208.58 eV, respectively (Fig. S5c). In addition, as shown in Fig. S5d, the fitted O 1s high-resolution spectra and fitted peaks correspond to the Nb-O bond (529.18 eV) and Co-O bond, (530.28 eV) respectively.

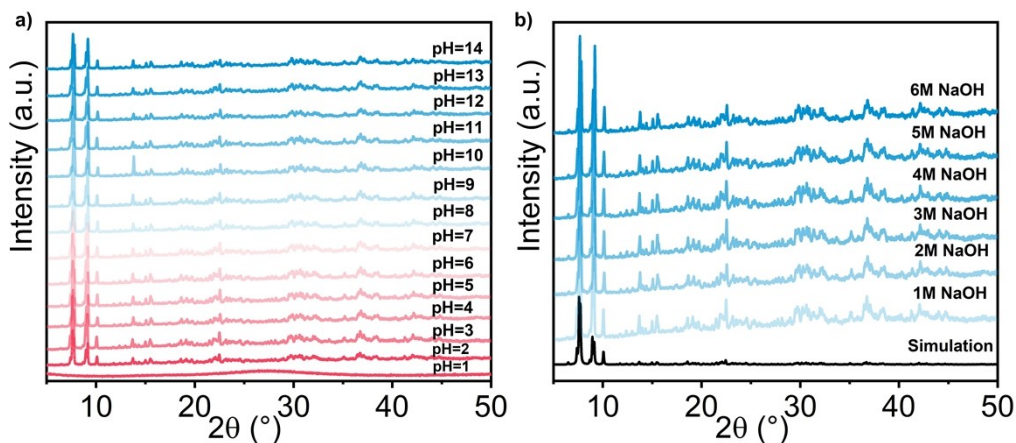

Fig. S6. Simulated and experimental PXRD patterns of  $\text{Co}_3\text{-Ti}_2\text{Nb}_8$  a) in pH = 1-14 KOH solutions and b) in 1-6 M NaOH solutions.

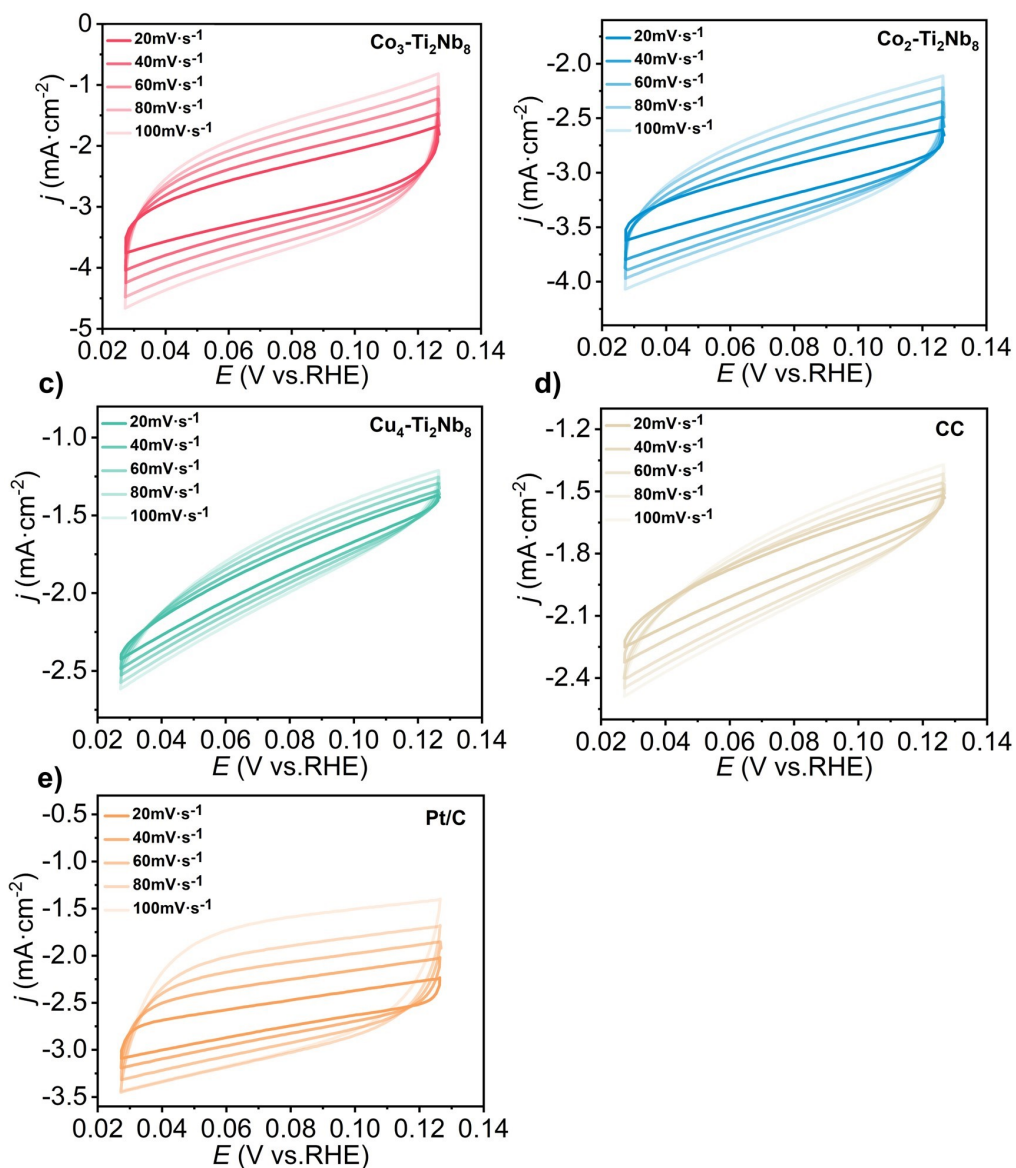

Fig. S7. CV curves for HER in 1.0 M KOH solution at a scan rate of 20, 40, 60, 80 and 100  $\text{mV s}^{-1}$ : a)  $\text{Co}_3\text{-Ti}_2\text{Nb}_8$  b)  $\text{Co}_2\text{-Ti}_2\text{Nb}_8$ , c)  $\text{Cu}_4\text{-Ti}_2\text{Nb}_8$ , d) Bare CC e) Pt/C.

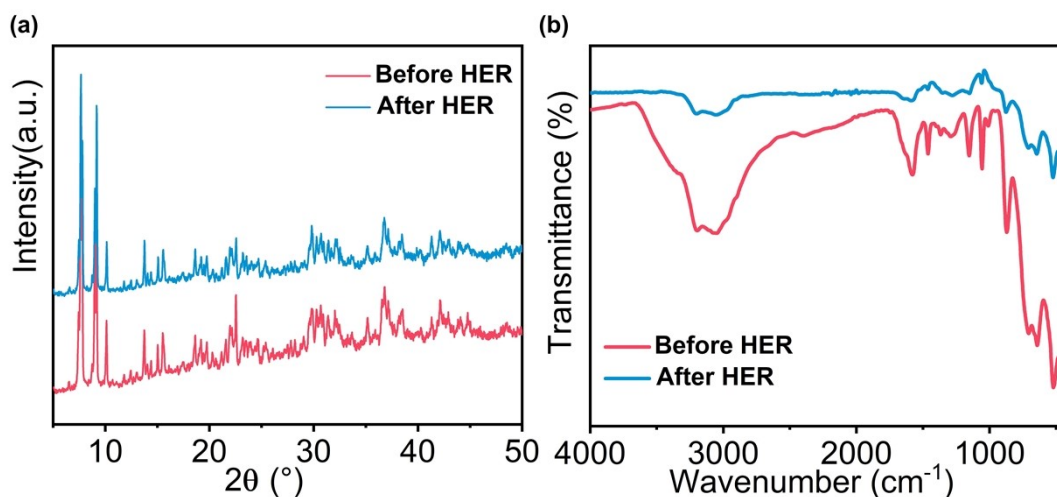

**Fig. S8.** a). Powder XRD patterns of  $\text{Co}_3\text{-Ti}_2\text{Nb}_8$  before and after 130 hours HER. b). IR spectrum of  $\text{Co}_3\text{-Ti}_2\text{Nb}_8$  before and after 130 hours HER.

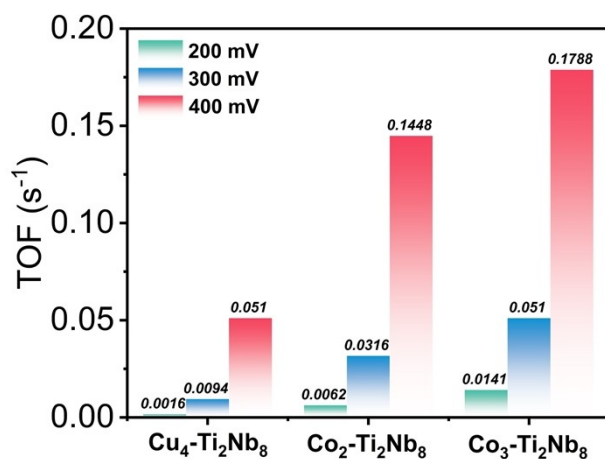

**Fig. S9.** a). TOF values of  $\text{Co}_3\text{-Ti}_2\text{Nb}_8$ ,  $\text{Co}_2\text{-Ti}_2\text{Nb}_8$  and  $\text{Cu}_4\text{-Ti}_2\text{Nb}_8$ .

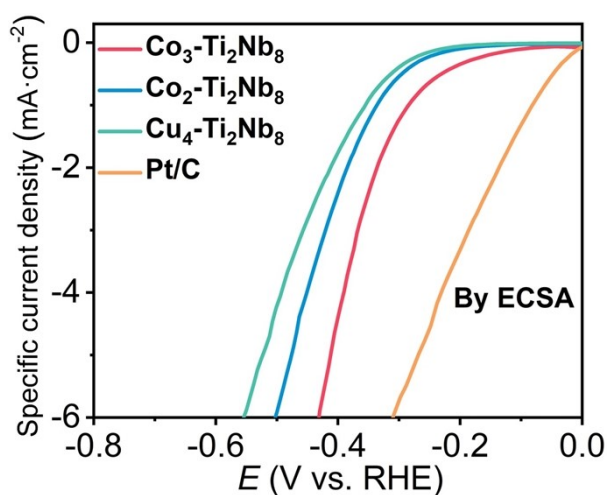

**Fig. S10.** LSV curves of  $\text{Co}_3\text{-Ti}_2\text{Nb}_8$ ,  $\text{Co}_2\text{-Ti}_2\text{Nb}_8$ ,  $\text{Cu}_4\text{-Ti}_2\text{Nb}_8$  and Pt/C normalized by ECSA.

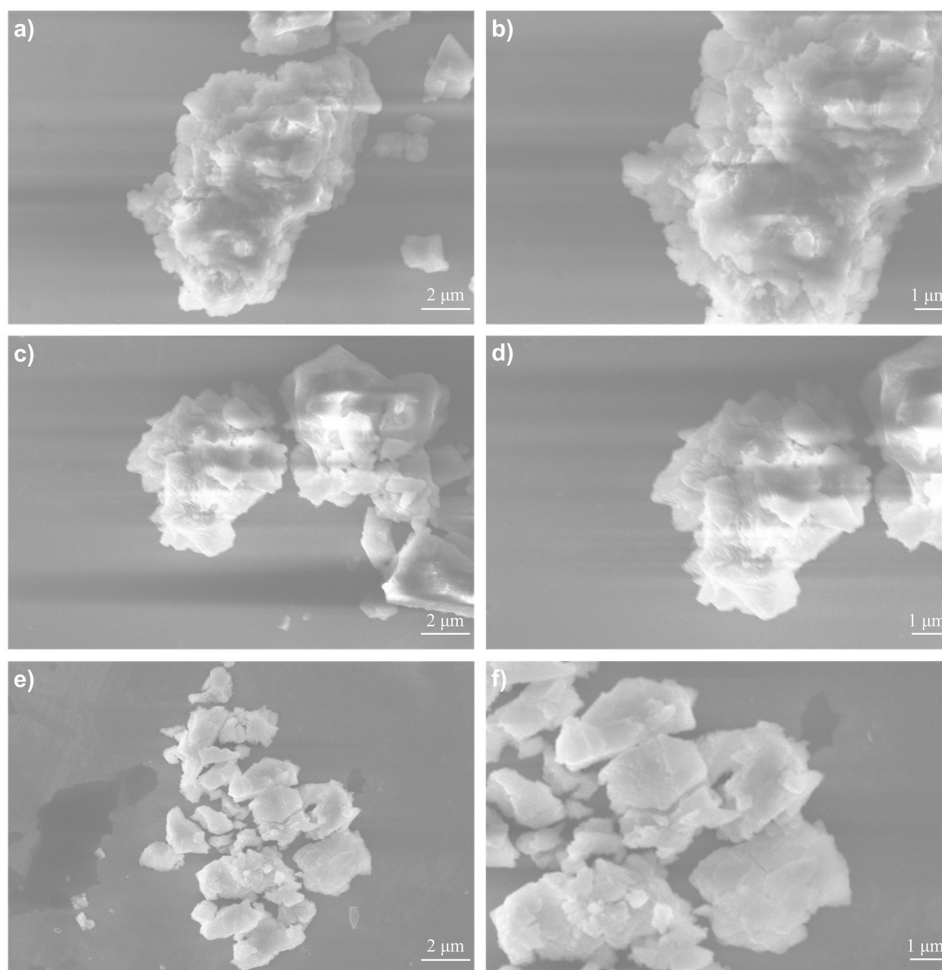

**Fig. S11.** Samples morphology. a), b) The FESEM images of  $\text{Co}_3\text{-Ti}_2\text{Nb}_8$ . Scale bars, 2  $\mu\text{m}$  and 1  $\mu\text{m}$ , respectively. c), d) The FESEM images of  $\text{Co}_2\text{-Ti}_2\text{Nb}_8$ . Scale bars, 2  $\mu\text{m}$  and 1  $\mu\text{m}$ , respectively. e), f) The FESEM images of  $\text{Cu}_4\text{-Ti}_2\text{Nb}_8$ . Scale bars, 2  $\mu\text{m}$  and 1  $\mu\text{m}$ , respectively.

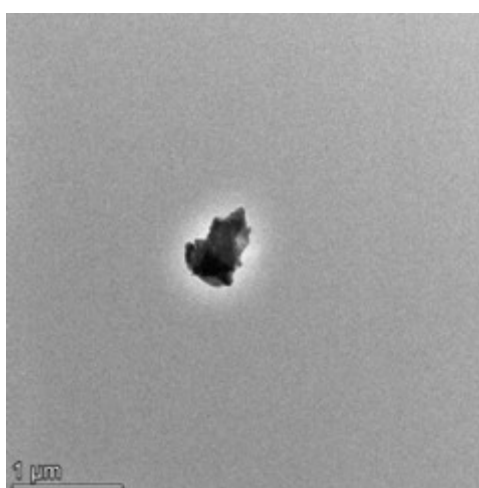

**Fig. S12.** TEM images of  $\text{Cu}_4\text{-Ti}_2\text{Nb}_8$ .

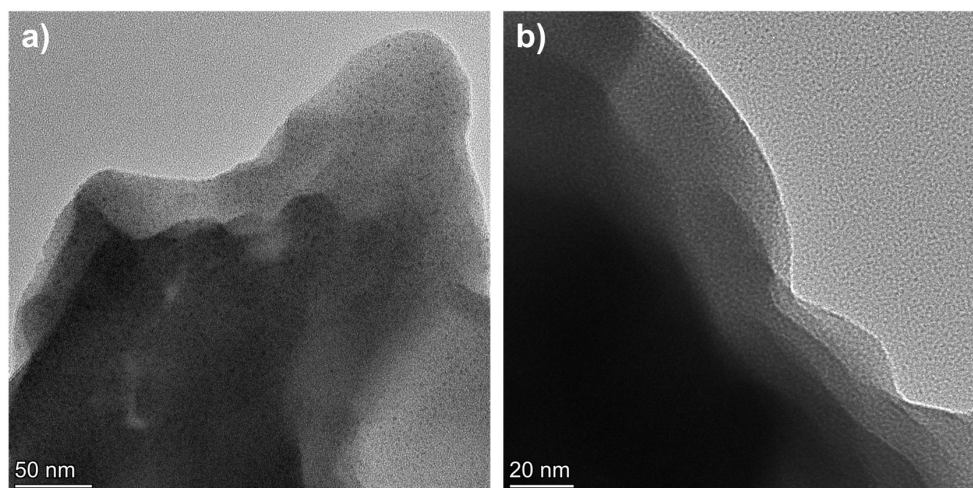

**Fig. S13.** a). and b). HRTEM images of  $\text{Cu}_4\text{-Ti}_2\text{Nb}_8$ .

## 4. References

1. M. FILOWITZ, R. K. C. HO, W. G. KLEMPERER, and W. SHUM,  $^{17}\text{O}$  Nuclear Magnetic Resonance Spectroscopy of Polyoxometalates. 1. Sensitivity and Resolution, *Inorg. Chem.*, 1978, **18**, 93-103.
2. Y.-T. Zhang, P. Huang, C. Qin, L.-K. Yan, B.-Q. Song, Z.-X. Yang, K.-Z. Shao and Z.-M. Su, A novel organic-inorganic hybrid constructed from the Nyman-type ditanoniobate  $[\text{Ti}_2\text{Nb}_8\text{O}_{28}]^{8-}$  and copper-organic cations, *Dalton Trans.*, 2014, **43**, 9847-9850.
3. G. M. Sheldrick, A short history of SHELX, *Acta Crystallogr., Sect. A: Found. Crystallogr.*, 2007, **64**, 112-122.
4. G. M. Sheldrick, Crystal structure refinement with SHELXL, *Acta Crystallogr., Sect. C: Struct. Chem.*, 2015, **71**, 3-8.
5. A. L. Spek, PLATONSQUEEZE: a tool for the calculation of the disordered solvent contribution to the calculated structure factors, *Acta Crystallogr., Sect. C: Struct. Chem.*, 2015, **71**, 9-18.
6. H. X. Jia, Y. C. Yao, Y. Y. Gao, D. P. Lu and P. W. Du, Pyrolyzed cobalt porphyrin-based conjugated mesoporous polymers as bifunctional catalysts for hydrogen production and oxygen evolution in water, *Chem. Commun.*, 2016, **52**, 13483-13486.
7. J. M. Li, Y. M. Kang, D. Liu, Z. Q. Lei and P. Liu, Nitrogen-Doped Graphitic Carbon-Supported Ultrafine Co Nanoparticles as an Efficient Multifunctional Electrocatalyst for HER and Rechargeable Zn-Air Batteries, *ACS Appl. Mater. Interfaces.*, 2020, **12**, 5717-5729.
8. A. S. a. D. BARFORD, Functions and Mechanisms of Redox Regulation of Cysteine-Based Phosphatases, *Antioxid. Redox Signal*, 2005, **7**, 560-577.
9. Y. Feng, X.-Y. Yu and U. Paik, Nickel cobalt phosphides quasi-hollow nanocubes as an efficient electrocatalyst for hydrogen evolution in alkaline solution, *Chem. Commun.*, 2016, **52**, 1633-1636.
10. M. Kuang, Q. Wang, P. Han and G. Zheng, Cu, Co-Embedded N-Enriched Mesoporous Carbon for Efficient Oxygen Reduction and Hydrogen Evolution Reactions, *Adv. Energy Mater.*, 2017, **7**, 1700193.
11. Y. Hao, Y. Xu, W. Liu and X. Sun, Co/CoP embedded in a hairy nitrogen-doped carbon polyhedron as an advanced tri-functional electrocatalyst, *Mater. Horiz.*, 2018, **5**, 108-115.
12. R.-Z. Sun, J.-X. Chen, S.-L. Huang, W.-T. Weng, H.-P. Wu, P.-W. Cai, Z.-H. Wen and S.-T. Zheng, Dissecting Structural Modification Effects on the Electrocatalytic Hydrogen Evolution Reaction Activity of



- Atomically Precise Polyoxometalates, *CCS Chem.*, 2024, 1-23.
13. Z. H. Xue, H. Su, Q. Y. Yu, B. Zhang, H. H. Wang, X. H. Li and J. S. Chen, Janus Co/CoP Nanoparticles as Efficient Mott–Schottky Electrocatalysts for Overall Water Splitting in Wide pH Range, *Adv. Energy Mater.*, 2017, **7**, 1602355.
  14. Y. Zhao, J. Zhang, K. Li, Z. Ao, C. Wang, H. Liu, K. Sun and G. Wang, Electrospun cobalt embedded porous nitrogen doped carbon nanofibers as an efficient catalyst for water splitting, *J. Mater. Chem. A*, 2016, **4**, 12818-12824.
  15. M. Khademalrasool and E. Kharatzadeh, SnS-rGO heterojunction: Fabrication, characterization, and visible light-induced optoelectronic performance analysis, *J. Photochem. Photobiol., A.*, 2023, **443**, 114878.
  16. M. Zeng, Y. Liu, F. Zhao, K. Nie, N. Han, X. Wang, W. Huang, X. Song, J. Zhong and Y. Li, Metallic Cobalt Nanoparticles Encapsulated in Nitrogen-Enriched Graphene Shells: Its Bifunctional Electrocatalysis and Application in Zinc–Air Batteries, *Adv. Funct. Mater.*, 2016, **26**, 4397-4404.
  17. J. H. Song, C. Z. Zhu, B. Z. Xu, S. Fu, M. H. Engelhard, R. Ye, D. Du, S. P. Beckman and Y. Lin, Bimetallic Cobalt-Based Phosphide Zeolitic Imidazolate Framework: CoP<sub>x</sub> Phase-Dependent Electrical Conductivity and Hydrogen Atom Adsorption Energy for Efficient Overall Water Splitting, *Adv. Energy Mater.*, 2016, **7**, 1601555.
  18. J. Tian, Q. Liu, A. M. Asiri and X. Sun, Self-Supported Nanoporous Cobalt Phosphide Nanowire Arrays: An Efficient 3D Hydrogen-Evolving Cathode over the Wide Range of pH 0–14, *J. Am. Chem. Soc.*, 2014, **136**, 7587-7590.
  19. C. Guan, X. M. Liu, A. M. Elshahawy, H. Zhang, H. Wu, S. J. Pennycook and J. Wang, Metal–organic framework derived hollow CoS<sub>2</sub> nanotube arrays: an efficient bifunctional electrocatalyst for overall water splitting, *Nanoscale Horiz.*, 2017, **2**, 342-348.
  20. S. Li, P. Ren, C. Yang, X. Liu, Z. Yin, W. Li, H. Yang, J. Li, X. Wang, Y. Wang, R. Cao, L. Lin, S. Yao, X. Wen and D. Ma, Fe<sub>5</sub>C<sub>2</sub> nanoparticles as low-cost HER electrocatalyst: the importance of Co substitution, *Sci. Bull.*, 2018, **63**, 1358-1363.
  21. Q. Wang, Z.-Y. Tian, W.-J. Cui, N. Hu, S.-M. Zhang, Y.-Y. Ma and Z.-G. Han, Hierarchical flower-like CoS<sub>2</sub>-MoS<sub>2</sub> heterostructure spheres as efficient bifunctional electrocatalyst for overall water splitting, *Int. J. Hydrogen Energy*, 2022, **47**, 12629-12641.
  22. Y.-J. Tang, A. M. Zhang, H.-J. Zhu, L.-Z. Dong, X.-L. Wang, S.-L. Li, M. Han, X.-X. Xu and Y.-Q. Lan, Polyoxometalate precursors for precisely controlled synthesis of bimetallic sulfide heterostructure through nucleation-doping competition, *Nanoscale*, 2018, **10**, 8404-8412.
  23. X. Du, Y. Ding and X. Zhang, MOF-derived Zn–Co–Ni sulfides with hollow nanosword arrays for high-efficiency overall water and urea electrolysis, *Green Energy Environ.*, 2023, **8**, 798-811.
  24. Y. Wang, Y. Pan, L. Zhu, H. Yu, B. Duan, R. Wang, Z. Zhang and S. Qiu, Solvent-free assembly of Co/Fe-containing MOFs derived N-doped mesoporous carbon nanosheets for ORR and HER, *Carbon*, 2019, **146**, 671-679.
  25. Y. Gao, L. Qi, F. He, Y. Xue and Y. Li, Selectively Growing a Highly Active Interface of Mixed Nb–Rh Oxide/2D Carbon for Electrocatalytic Hydrogen Production, *Adv. Sci.*, 2022, **9**, 2104706.
  26. X. H. Chen, X. L. Li, L. L. Wu, H. C. Fu, J. Luo, L. Shen, Q. Zhang, J. L. Lei, H. Q. Luo and N. B. Li, Nb<sub>2</sub>O<sub>5</sub>–Ni<sub>3</sub>N heterojunction tuned by interface oxygen vacancy engineering for the enhancement of electrocatalytic hydrogen evolution activity, *J. Mater. Chem. A*, 2021, **9**, 11563-11570.
  27. S. Zhao, C. Tan, C.-T. He, J. Dong and Z. Tang, Structural transformation of highly active metal-organic framework electrocatalysts during the oxygen evolution reaction, *Nat. Energy*, 2020, **5**, 881-890.
